# Supplementary material for: The effect of social connections on the discovery of multiple hidden food patches in a bird species
Source: PubMed Central journal article supplement (PMC5429748; doi:10.1038/s41598-017-00929-8), 2017-04-11
Supplement: 41598_2017_929_MOESM1_ESM.pdf [file 41598_2017_929_MOESM1_ESM.pdf]

# 1 **Supplementary Information**

2

## 3 **The effect of social connections on the discovery of multiple hidden food patches in a bird** 4 **species**

5 Zoltán Tóth, Beniamino Tuliozi, Davide Baldan, Herbert Hoi and Matteo Griggio

6

### 7 **Tutor flocks**

8 Two weeks prior to the experiment, two groups of four individuals (two males and two females)  
9 were allocated into two outdoor aviaries ( $3.9 \times 1.9 \times 3$  m; ‘tutor aviaries’ henceforward). These  
10 aviaries were equipped with a roosting tree, several perches, nest boxes and a water basin. On the  
11 floor two same sized brown cardboard boxes ( $33 \times 21 \times 12$  cm) were placed, equidistant to the  
12 roosting tree and perches, about 0.5 m from each other. The boxes were open only on one of the  
13 long sides opposite to the roosting site. The only food source in these aviaries was approx. 60 g of  
14 millet spray provided daily under one of the boxes, anchored on an inner side so that the food was  
15 only visible and accessible when the birds approached the box from the front. On the top of the box  
16 containing food a small coloured marking (a 5 cm diameter circle; for a similar approach, please see  
17 [1]) was placed and alternated between boxes on consecutive days. The colour of the markings,  
18 light blue and magenta, differed between the two tutor aviaries. Before food was added every  
19 morning, the boxes were temporarily removed with any leftovers from the aviary, and the floor  
20 around the boxes was carefully cleaned. Then, both the empty box and the one hiding the food was  
21 put back into the aviaries, and the coloured marking was always associated with the box containing  
22 the food so tutor individuals could rely only on the coloured marking and on approaching the boxes  
23 to identify the presence of food. These aviaries were used to train informed individuals for the  
24 experimental flocks.

25

26

## 27 **Experimental flocks**

28 The experimental flocks consisted of ten adult individuals (five males and five females) randomly  
29 chosen from the eight unisex outdoor aviaries. Each individual was used once during the study. The  
30 experimental individuals were transferred into an experimental aviary and individually banded with  
31 metallic and coloured rings. To facilitate the identification of birds from video recordings, the  
32 crown feathers of all the individuals were painted with non-toxic coloured markers (Deco painter  
33 matt, Marabu GmbH & Co. KG, Germany). Tarsus, wing and tail length (to the nearest 0.1 mm)  
34 were measured as well as body mass before and after the experiment (to the nearest 0.1 g). The  
35 experimental aviary (2.8 × 2.7 × 2.1 m) was equipped with a roosting tree, several perches, and a  
36 water basin situated at the back of the aviary. A single feeder was situated at the center of the aviary  
37 on a small platform approx. 10 cm off the ground, and served as the main food source. Commercial  
38 food for granivorous passerines was provided on the feeder, but the amount differed according to  
39 the experimental design. In the front side of the experimental aviary, similarly to the tutor aviaries,  
40 four same sized brown cardboard boxes (identical to the ones placed into the tutor aviaries) were  
41 placed on the floor, about 20 cm distant one another. These boxes were only open on the side  
42 opposite to the roosting site and were fixed on the floor.

43 Three webcams (Microsoft Lifecam Studios, model Q2F00015) were placed inside the  
44 aviaries throughout the entire experimental period, one recording the activity at the central feeder,  
45 and the remaining two positioned in front of those two cardboard boxes (approx. 30 cm distant)  
46 which were *a priori* randomly selected for hiding the food during the trial. Other than natural light  
47 from different windows, artificial light was also provided with 12:12 h light:dark periods (07:00-  
48 19:00). The experimental indoor aviary was maintained at a temperature of about 20 Celsius  
49 degrees. At the formation of the experimental group, birds were allowed to become familiar with  
50 the environment of the experimental aviary for 1 day, during which food was provided *ad libitum*

51 on the central feeder. The evening before the onset of the trial the feeder was removed and the floor  
52 carefully cleaned from seeds.

53

#### 54 **Network-based diffusion analysis (NBDA)**

55

56 NBDA was initially developed by Franz & Nunn [2] and extended by Hoppitt et al. [3] (for  
57 additional extensions see also 4, 5-7]. We used the order of acquisition diffusion analysis (OADA)  
58 variant of NBDA [3], where the model is fit on the order of individual acquisitions, thus measures  
59 the relative rate at which individuals acquire the trait. OADA has the advantage that it is insensitive  
60 to the shape of the baseline function, and is recommended to be used if the baseline rate of  
61 acquisition changes over time [3]. However, a weakness of OADA is that this method can detect  
62 social transmission only if it results in substantial differences between the rates of acquisition by  
63 which individuals acquire the trait [3]. In a standard OADA, the baseline rate of acquisition is  
64 unspecified with the assumption that each diffusion has its own baseline rate. Alternatively,  
65 different diffusions or tasks may be included in the same stratum, in which case they are treated as a  
66 single diffusion with zero connections among individuals from different diffusions and the same  
67 baseline rate function can be assumed in all diffusions within each stratum. Stratifying by food  
68 patch in our study also allowed us to estimate different social transmission parameters for each  
69 stratum, i.e. for each food patch in the flocks. With this set-up, the potential influence of social  
70 connections in homogeneous networks on patch discovery could also be tested. Individual-level  
71 variables influencing the rate at which an individual acquires a trait can be incorporated into an  
72 OADA using an additive model:

73

$$74 \quad R_{i,j}(n) = (1 - z_i(n)) \left( s_l \sum_{j=1}^N (\alpha_{i,j} z_j(n)) + (1 - s_l) \exp \left( \sum_{k=1}^V \beta_k x_{k,i} \right) \right), \quad (1)$$

75 or individual-level variables can be incorporated using a multiplicative model:

76

$$R_{i,l}(n) = (1 - z_i(n)) \left( s_l \sum_{j=1}^N (\alpha_{i,j} z_j(n)) + (1 - s_l) \right) \exp \left( \sum_{k=1}^V \beta_k x_{k,i} \right), \quad (2)$$

77

78 where  $R_{i,l}(n)$  is individual  $i$ 's relative rate of acquisition of the trait immediately prior to the  $n$ th  
79 acquisition event in stratum  $l$ ,  $z_i(n)$  is the status of individual  $i$  prior to the  $n$ th acquisition event,  $s_l$   
80  $\geq 0$  is a parameter determining the rate of social transmission between individuals per unit of  
81 network connection in stratum  $l$  ( $s_l = 0$  indicates that all acquisition is by asocial means in stratum  
82  $l$ ),  $\alpha_{i,j}$  is the network connection leading from individual  $j$  to  $i$ ,  $z_j(n)$  is the status of  $j$  prior to the  $n$ th  
83 acquisition event (1 indicates informed and 0 indicates naïve),  $N$  is the number of individuals,  $\beta_k$  is  
84 the coefficient determining the effect of variable  $k$ ,  $x_{k,i}$  is the value of variable  $k$  for individual  $i$ , and  
85  $V$  is the number of individual level variables in the model [3,8].

86

87 **Table S1. Observed foraging events in the house sparrow flocks during the pre-training**  
88 **period.** Identified foraging events represent those observed events at the central feeder for which all  
89 participants were successfully identified. The total number of visits for an individual was calculated  
90 as the sum of the number of arriving at the central feeder alone, by following a flock-mate and in  
91 groups without a specific initiator; the flock-level measure of this variable was obtained by  
92 summing the individual-level data across all birds in a given flock.

| Flock | # of identified foraging events | Identification accuracy (%) | # of followings | Total # of visits |
|-------|---------------------------------|-----------------------------|-----------------|-------------------|
| 1     | 1419                            | 97.26                       | 678             | 1855              |
| 2     | 2093                            | 92.32                       | 1242            | 2704              |
| 3     | 426                             | 93.83                       | 101             | 512               |
| 4     | 2362                            | 87.35                       | 543             | 3471              |
| 5     | 1420                            | 82.80                       | 758             | 1892              |
| 6     | 1645                            | 82.41                       | 937             | 2229              |
| 7     | 1578                            | 97.23                       | 730             | 2068              |
| 8     | 1143                            | 98.79                       | 394             | 1398              |
| 9     | 880                             | 97.56                       | 351             | 1108              |

|    |      |       |     |      |
|----|------|-------|-----|------|
| 10 | 1014 | 99.12 | 217 | 1175 |
|----|------|-------|-----|------|

93

94 **Table S2. Type and relative support of the fitted 72 models.** Present: social model (i.e. social  
95 transmission is present at least at one patch), Absent: asocial model (i.e. no social transmission);  
96 Same  $s$  at the patches: social transmission rate is the same at the two patches, Different  $s$  at the  
97 patches: social transmission rate is different at the two patches,  $s$  only at patch 1: social  
98 transmission rate is estimated only at the first-discovered patch,  $s$  only at patch 2: social  
99 transmission rate is estimated only at the second-discovered patch; F: fitted with following-based  
100 networks, H: fitted with homogeneous networks; ILV: individual-level variable (i.e. ‘sex’, ‘age’, or  
101 ‘feeding activity’). Models in the ‘best models’ set (i.e. models fitted with the following-based  
102 networks and within 4  $\Delta$ AICc to the best-fitting model) are written in bold.

| Model order | Social transmission | Model category                                 | Type     | ILV                               | AICc           | $\Delta$ AICc | $W_{\text{Akaike}}$ (%) |
|-------------|---------------------|------------------------------------------------|----------|-----------------------------------|----------------|---------------|-------------------------|
| <b>1</b>    | <b>present</b>      | <b><math>s</math> only at patch 1</b>          | <b>F</b> | <b>sex, feeding activity</b>      | <b>1037.11</b> | <b>0.00</b>   | <b>0.23</b>             |
| <b>2</b>    | <b>present</b>      | <b><math>s</math> only at patch 1</b>          | <b>F</b> | <b>sex, age, feeding activity</b> | <b>1037.81</b> | <b>0.70</b>   | <b>0.16</b>             |
| <b>3</b>    | <b>present</b>      | <b>different <math>s</math> at the patches</b> | <b>F</b> | <b>sex, feeding activity</b>      | <b>1038.05</b> | <b>0.94</b>   | <b>0.14</b>             |
| <b>4</b>    | <b>present</b>      | <b>different <math>s</math> at the patches</b> | <b>F</b> | <b>sex, age, feeding activity</b> | <b>1039.00</b> | <b>1.89</b>   | <b>0.09</b>             |
| 5           | present             | same $s$ at the patches                        | H        | sex                               | 1040.10        | 2.99          | 0.05                    |
| 6           | present             | same $s$ at the patches                        | H        | -                                 | 1040.41        | 3.30          | 0.04                    |
| 7           | <b>present</b>      | <b><math>s</math> only at patch 1</b>          | <b>F</b> | <b>feeding activity</b>           | <b>1040.80</b> | <b>3.69</b>   | <b>0.04</b>             |
| 8           | <b>present</b>      | <b><math>s</math> only at patch 1</b>          | <b>F</b> | <b>age, feeding activity</b>      | <b>1041.08</b> | <b>3.97</b>   | <b>0.03</b>             |
| 9           | present             | different $s$ at the patches                   | H        | sex                               | 1041.66        | 4.55          | 0.02                    |
| 10          | present             | same $s$ at the patches                        | H        | sex, feeding activity             | 1041.74        | 4.63          | 0.02                    |
| 11          | present             | same $s$ at the patches                        | H        | feeding activity                  | 1041.85        | 4.74          | 0.02                    |
| 12          | present             | different $s$ at the patches                   | H        | -                                 | 1041.94        | 4.83          | 0.02                    |

|    |         |                                   |   |                            |         |       |      |
|----|---------|-----------------------------------|---|----------------------------|---------|-------|------|
| 13 | present | same <i>s</i> at the patches      | H | sex, age                   | 1042.25 | 5.13  | 0.02 |
| 14 | present | different <i>s</i> at the patches | F | feeding activity           | 1042.43 | 5.32  | 0.02 |
| 15 | present | same <i>s</i> at the patches      | H | age                        | 1042.50 | 5.39  | 0.02 |
| 16 | present | different <i>s</i> at the patches | F | age, feeding activity      | 1042.89 | 5.78  | 0.01 |
| 17 | present | different <i>s</i> at the patches | H | sex, feeding activity      | 1043.37 | 6.25  | 0.01 |
| 18 | present | different <i>s</i> at the patches | H | feeding activity           | 1043.45 | 6.34  | 0.01 |
| 19 | present | different <i>s</i> at the patches | H | sex, age                   | 1043.82 | 6.71  | 0.01 |
| 20 | present | same <i>s</i> at the patches      | H | sex, age, feeding activity | 1043.92 | 6.81  | 0.01 |
| 21 | present | same <i>s</i> at the patches      | H | age, feeding activity      | 1044.00 | 6.89  | 0.01 |
| 22 | present | different <i>s</i> at the patches | H | age                        | 1044.02 | 6.91  | 0.01 |
| 23 | present | same <i>s</i> at the patches      | F | sex, feeding activity      | 1045.24 | 8.12  | 0.00 |
| 24 | present | different <i>s</i> at the patches | H | sex, age, feeding activity | 1045.58 | 8.47  | 0.00 |
| 25 | present | same <i>s</i> at the patches      | F | sex, age, feeding activity | 1046.81 | 9.70  | 0.00 |
| 26 | present | different <i>s</i> at the patches | H | age, feeding activity      | 1048.06 | 10.94 | 0.00 |
| 27 | present | same <i>s</i> at the patches      | F | feeding activity           | 1048.40 | 11.28 | 0.00 |
| 28 | present | same <i>s</i> at the patches      | F | age, feeding activity      | 1049.79 | 12.67 | 0.00 |
| 29 | present | <i>s</i> only at patch 1          | F | sex, age                   | 1050.37 | 13.26 | 0.00 |
| 30 | present | <i>s</i> only at patch 1          | F | sex                        | 1050.81 | 13.69 | 0.00 |
| 31 | present | <i>s</i> only at patch 1          | H | sex                        | 1050.82 | 13.71 | 0.00 |
| 32 | present | <i>s</i> only at patch 1          | H | -                          | 1050.96 | 13.85 | 0.00 |
| 33 | present | <i>s</i> only at patch 1          | H | feeding activity           | 1051.68 | 14.57 | 0.00 |

|    |         |                                   |   |                            |         |       |      |
|----|---------|-----------------------------------|---|----------------------------|---------|-------|------|
| 34 | present | <i>s</i> only at patch 1          | H | sex, feeding activity      | 1051.80 | 14.68 | 0.00 |
| 35 | present | <i>s</i> only at patch 1          | H | age                        | 1052.29 | 15.18 | 0.00 |
| 36 | present | <i>s</i> only at patch 1          | H | sex, age                   | 1052.31 | 15.20 | 0.00 |
| 37 | present | <i>s</i> only at patch 1          | F | age                        | 1052.56 | 15.44 | 0.00 |
| 38 | present | different <i>s</i> at the patches | F | sex, age                   | 1052.56 | 15.45 | 0.00 |
| 39 | present | different <i>s</i> at the patches | F | sex                        | 1052.96 | 15.84 | 0.00 |
| 40 | present | <i>s</i> only at patch 1          | H | age, feeding activity      | 1053.38 | 16.27 | 0.00 |
| 41 | present | <i>s</i> only at patch 1          | F | -                          | 1053.57 | 16.46 | 0.00 |
| 42 | present | <i>s</i> only at patch 1          | H | sex, age, feeding activity | 1053.60 | 16.49 | 0.00 |
| 43 | present | different <i>s</i> at the patches | F | age                        | 1054.71 | 17.59 | 0.00 |
| 44 | present | different <i>s</i> at the patches | F | -                          | 1055.69 | 18.58 | 0.00 |
| 45 | present | <i>s</i> only at patch 2          | H | -                          | 1056.10 | 18.99 | 0.00 |
| 46 | present | <i>s</i> only at patch 2          | H | sex                        | 1056.55 | 19.43 | 0.00 |
| 47 | present | <i>s</i> only at patch 2          | H | feeding activity           | 1056.56 | 19.45 | 0.00 |
| 48 | present | <i>s</i> only at patch 2          | H | sex, feeding activity      | 1057.31 | 20.20 | 0.00 |
| 49 | present | <i>s</i> only at patch 2          | H | age                        | 1057.97 | 20.85 | 0.00 |
| 50 | present | same <i>s</i> at the patches      | F | sex, age                   | 1058.08 | 20.97 | 0.00 |
| 51 | present | same <i>s</i> at the patches      | F | sex                        | 1058.09 | 20.98 | 0.00 |
| 52 | present | <i>s</i> only at patch 2          | H | sex, age                   | 1058.50 | 21.38 | 0.00 |
| 53 | present | <i>s</i> only at patch 2          | H | age, feeding activity      | 1058.66 | 21.55 | 0.00 |
| 54 | present | same <i>s</i> at the patches      | F | age                        | 1059.32 | 22.21 | 0.00 |
| 55 | present | <i>s</i> only at patch 2          | H | sex, age, feeding activity | 1059.46 | 22.34 | 0.00 |
| 56 | present | same <i>s</i> at the patches      | F | -                          | 1059.52 | 22.40 | 0.00 |

|    |         |                   |   |                            |         |       |      |
|----|---------|-------------------|---|----------------------------|---------|-------|------|
| 57 | absent  | -                 | - | feeding activity           | 1063.62 | 26.51 | 0.00 |
| 58 | absent  | -                 | - | -                          | 1064.37 | 27.26 | 0.00 |
| 59 | absent  | -                 | - | sex, feeding activity      | 1064.55 | 27.44 | 0.00 |
| 60 | absent  | -                 | - | sex                        | 1064.95 | 27.84 | 0.00 |
| 61 | absent  | -                 | - | age, feeding activity      | 1065.05 | 27.94 | 0.00 |
| 62 | absent  | -                 | - | age                        | 1065.11 | 28.00 | 0.00 |
| 63 | absent  | -                 | - | sex, age                   | 1065.81 | 28.70 | 0.00 |
| 64 | present | s only at patch 2 | F | feeding activity           | 1065.83 | 28.72 | 0.00 |
| 65 | absent  | -                 | - | sex, age, feeding activity | 1066.02 | 28.91 | 0.00 |
| 66 | present | s only at patch 2 | F | -                          | 1066.53 | 29.42 | 0.00 |
| 67 | present | s only at patch 2 | F | sex, feeding activity      | 1066.82 | 29.71 | 0.00 |
| 68 | present | s only at patch 2 | F | sex                        | 1067.17 | 30.05 | 0.00 |
| 69 | present | s only at patch 2 | F | age, feeding activity      | 1067.33 | 30.22 | 0.00 |
| 70 | present | s only at patch 2 | F | age                        | 1067.33 | 30.22 | 0.00 |
| 71 | present | s only at patch 2 | F | sex, age                   | 1068.09 | 30.98 | 0.00 |
| 72 | present | s only at patch 2 | F | sex, age, feeding activity | 1068.36 | 31.25 | 0.00 |

103

104 **Table S3. Relative supports for the OADA models fitted separately at the first- and second-**  
105 **exploited food patches.** The number of models in each category is written in brackets; values in  
106 bold indicate the best supported category at each patch. Relative support was calculated by  
107 summing Akaike weights across the set of models. The ‘No ILV’ models are those which did not  
108 include any individual-level variables (i.e. ‘sex’, ‘age’, or ‘feeding activity’).

| Food patch              | Asocial models | Models with social transmission |                       |                   |
|-------------------------|----------------|---------------------------------|-----------------------|-------------------|
| First-discovered patch  | 0.03% (8)      | 99.97% (15)                     | <b>Multiplicative</b> | <b>80.77% (7)</b> |
|                         |                |                                 | Additive              | 17.39% (7)        |
|                         |                |                                 | No ILV                | 1.81% (1)         |
| Second-discovered patch | 34.93% (8)     | 65.07% (15)                     | <b>Multiplicative</b> | <b>38.00% (7)</b> |
|                         |                |                                 | Additive              | 27.06% (7)        |
|                         |                |                                 | No ILV                | <0.01% (1)        |

109

110



111 **References**

- 112 1. Morand-Ferron, J., Hamblin, S., Cole, E. F., Aplin, L. M., & Quinn, J. L. Taking the operant  
113 paradigm into the field: associative learning in wild great tits. *PLoS ONE*, **10**(8), e0133821  
114 (2015).
- 115 2. Franz, M., & Nunn, C. L. Network-based diffusion analysis: a new method for detecting  
116 social learning. *Proc. R. Soc. Lond. B* **276**(1663), 1829–1836 (2009).
- 117 3. Hoppitt, W., Boogert, N. J., & Laland, K. N. Detecting social transmission in networks. *J.*  
118 *Theor. Biol.* **263**(4), 544–555 (2010a).
- 119 4. Atton, N., Hoppitt, W., Webster, M. M., Galef, B. G. & Laland, K. N. Information flow  
120 through threespine stickleback networks without social transmission. *Proc. R. Soc. Lond. B*  
121 **279**(1745), 4272–4278 (2012).
- 122 5. Farine, D. R., Spencer, K. A., & Boogert, N. J. Early-life stress triggers juvenile zebra  
123 finches to switch social learning strategies. *Curr. Biol.* **25**(16), 2184–2188 (2015b).
- 124 6. Atton, N., Galef, B. J., Hoppitt, W., Webster, M. M., & Laland, K. N. Familiarity affects  
125 social network structure and discovery of prey patch locations in foraging stickleback  
126 shoals. *Proc. R. Soc. Lond. B.* **281**(1789), 20140579 (2014).
- 127 7. Webster, M. M., Atton, N., Hoppitt, W. J., & Laland, K. N. Environmental complexity  
128 influences association network structure and network-based diffusion of foraging  
129 information in fish shoals. *Am. Nat.* **181**(2), 235–244 (2013).
- 130 8. Hoppitt, W., & Laland, K. N. *Social learning: an introduction to mechanisms, methods, and*  
131 *models* (eds Princeton University Press) (Princeton 2013).
